# Supplementary material for: Akzeptanz grenzüberschreitender Rettungsdiensteinsätze
Source: Springer Nature journal article supplement (doi:10.1007/s10049-023-01183-4), 2023-08-25
Supplement: MOESM1 [file 25966654]

Zusatzmaterial zum Beitrag „Akzeptanz grenzüberschreitender Rettungsdiensteinsätze“ von Bäßler, J., Orsson, J., Kuntosch, J., Fleßa S. (2023) in *Notfall+Rettenungsmedizin*.  
Beitrag und Zusatzmaterial stehen Ihnen auf [www.springermedizin.de](http://www.springermedizin.de) zur Verfügung. Bitte geben Sie dort den Beitragstitel in die Suche ein.

## Befragungsleitfaden

### Einleitung des Interviews

#### 1. Geschlecht

- Männlich
- Weiblich

#### 2. In welchem Bundesland wohnen Sie?

- Baden-Württemberg
- Bayern
- Berlin
- Brandenburg
- Bremen
- Hamburg
- Hessen
- Mecklenburg-Vorpommern
- Niedersachsen
- Nordrhein-Westfalen
- Rheinland-Pfalz
- Saarland
- Sachsen
- Sachsen-Anhalt
- Schleswig-Holstein
- Thüringen

#### 3. Welcher Altersgruppe gehören Sie an?

- 18-29 Jahre
- 30-49 Jahre
- 50-65 Jahre
- Über 65 Jahre

#### 4. Wurden Sie selbst schon einmal von einem polnischen Rettungsteam versorgt?

- Nein
- Freie Antwort (bitte Erfahrungen schildern)

#### 5. Würden Sie sich in einem medizinischen Notfall von dem polnischen Rettungsdienst versorgen lassen, wenn dieser schneller bei Ihnen sein kann als ein deutsches Rettungsteam?

- Ja
- Nein

#### 6. Würden Sie sich von dem Rettungsteam auch in ein polnisches Krankenhaus bringen lassen, wenn dies schneller zu erreichen wäre als ein deutsches Krankenhaus?

- Ja
- Nein

#### 7. Können Sie sich Herausforderungen vorstellen, die sich bei der Versorgung durch ein polnisches Rettungsteam ergeben können?

- Freie Antwort

#### 8. Falls ja, wie könnte man diesen entgegenwirken?

- Freie Antwort

### Abschluss des Interviews
